# Supplementary material for: Synchronous oil/water separation and wastewater treatment on a copper-oxide-coated mesh
Source: Royal Society of Chemistry journal article supplement (doi:10.1039/d1ra02334a), 2021-01-01
Supplement: d1ra02334a1.pdf [file d1ra02334a1.pdf]

## Supporting information

# Synchronous oil/water separation and wastewater treatment on a copper-oxide-coated mesh

Yahua Liu<sup>1</sup>, Peng Xu<sup>1</sup>, Wenna Ge<sup>1</sup>, Chenguang Lu<sup>1</sup>, Yunlai Li<sup>1</sup>, Shichao Niu<sup>2</sup>, Junqiu Zhang<sup>2</sup>, Shile Feng<sup>1\*</sup>

<sup>1</sup>Key Laboratory for Precision & Non-traditional Machining Technology of Ministry of Education, Dalian University of Technology, Dalian 116024, China

<sup>2</sup>Key Laboratory of Bionic Engineering, Ministry of Education, Jilin University, Changchun 130022, China

\*Correspondence should be addressed to S.F. ([fengshile@dlut.edu.cn](mailto:fengshile@dlut.edu.cn)).

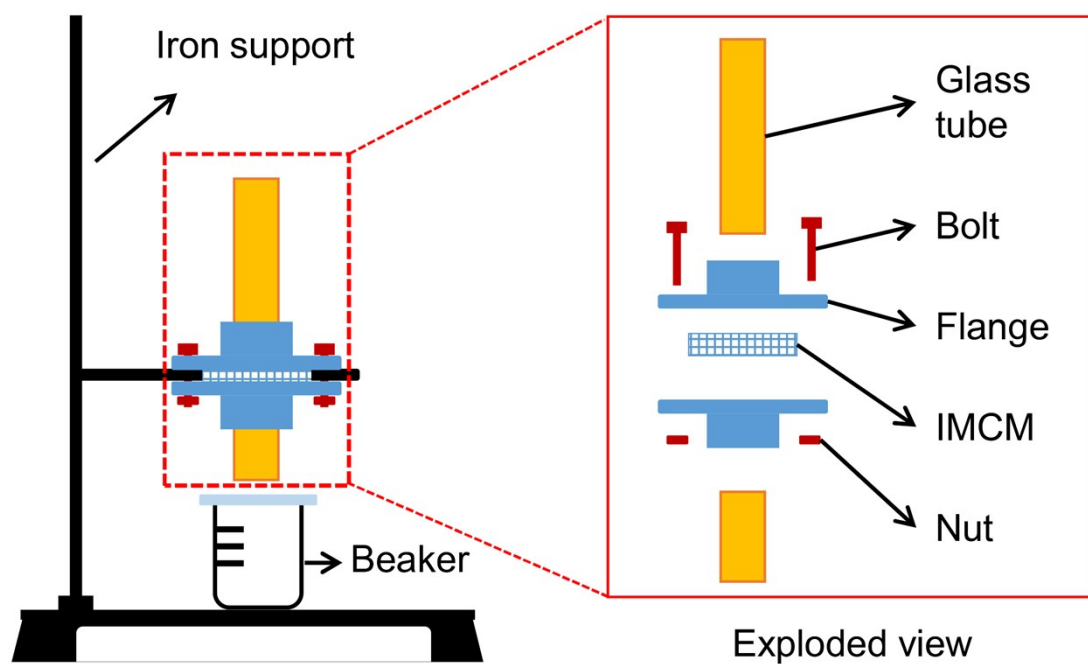

**Figure S1.** The schematic of oil/water separating device. The IMCM is clamped between two flanges by four bolts while two glass tubes are fixed in the grooves of the flanges. The oil/water mixture is poured into the upper glass tube and the water is collected by the beaker below.

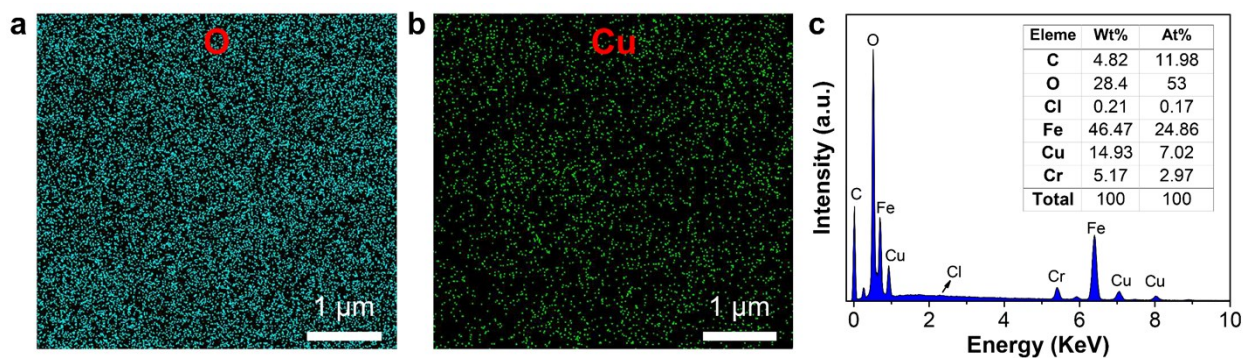

**Figure S2.** The EDS images of the IMCM with  $w = 5\%$ . (a) The EDS mapping of O element. (b) The EDS mapping of Cu element. (c) The EDS spectrum of the IMCM. The contents of all the elements are described as the table.

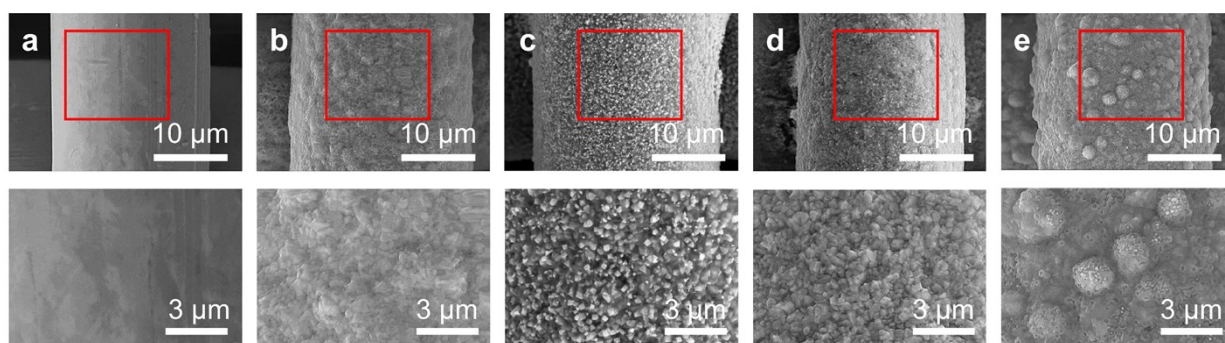

**Figure S3.** The morphology structures of different IMCM. (a) The SEM images of the IMCM with  $w = 0\%$ . (b) The SEM images of the IMCM with  $w = 1\%$ . (c) The SEM images of the IMCM with  $w = 3\%$ . (d) The SEM images of the IMCM with  $w = 5\%$ . (e) The SEM images of the IMCM with  $w = 7\%$ .

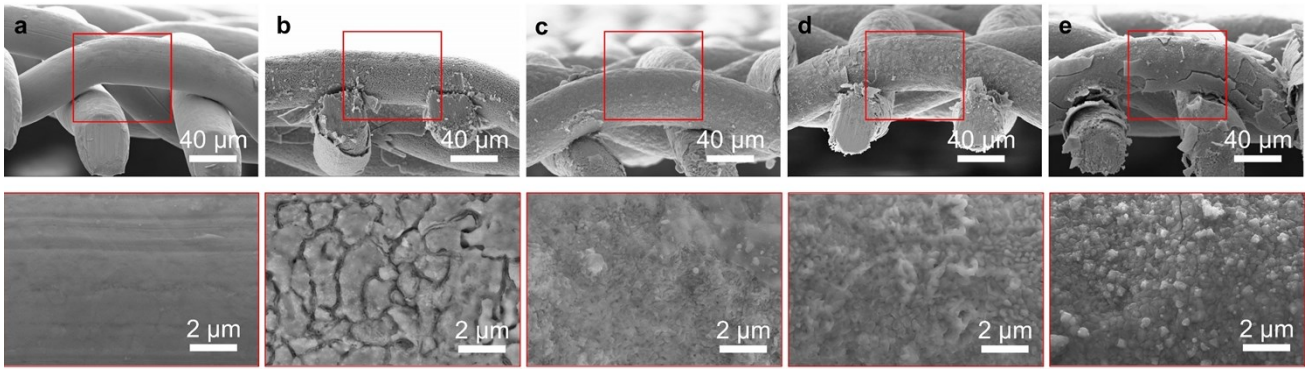

**Figure S4.** The morphology structures on the cross section of IMCM. (a) The cross-section images of the IMCM with  $w = 0\%$ . (b) The cross-section images of the IMCM with  $w = 1\%$ . (c) The cross-section images of the IMCM with  $w = 3\%$ . (d) The cross-section images of the IMCM with  $w = 5\%$ . (e) The cross-section images of the IMCM with  $w = 7\%$ .

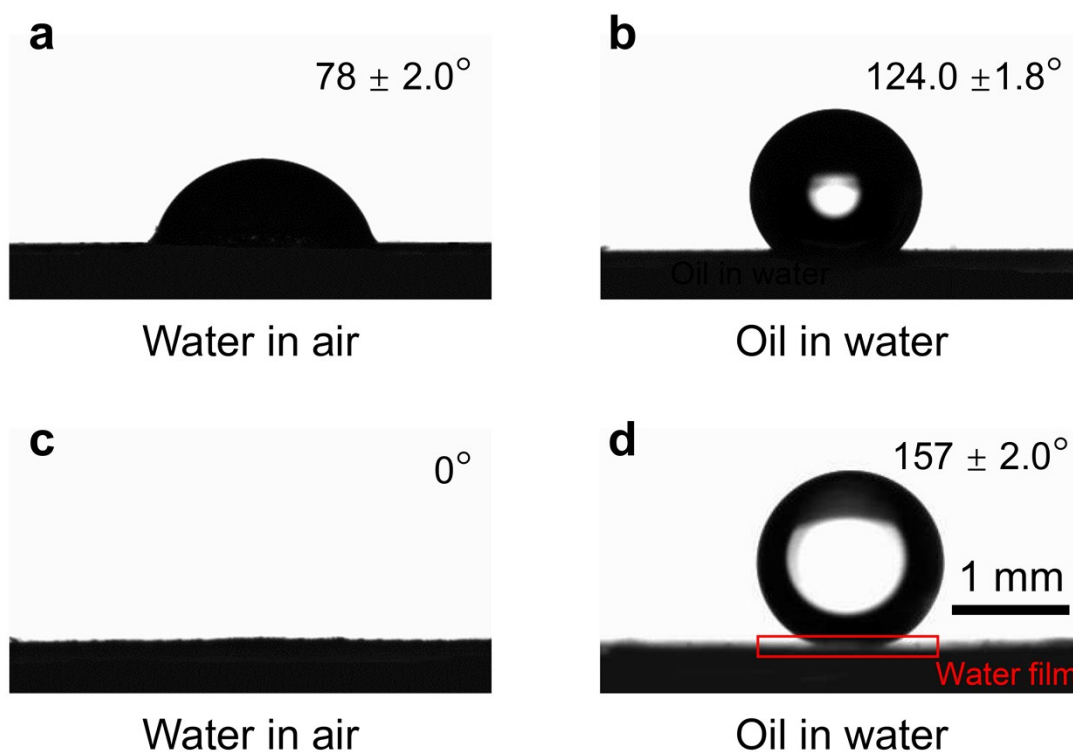

**Figure S5.** The wettability of different IMCM surfaces. (a) The contact angle of a water droplet on the IMCM surface with  $w = 0\%$  in air. (b) The contact angle of an oil droplet on the IMCM surface with  $w = 0\%$  underwater. (c) The contact angle of a water droplet on the IMCM surface with  $w = 5\%$  in air. (d) The contact angle of an oil droplet on the IMCM surface with  $w = 5\%$  underwater. The volume of the droplet is  $3 \mu\text{L}$ .

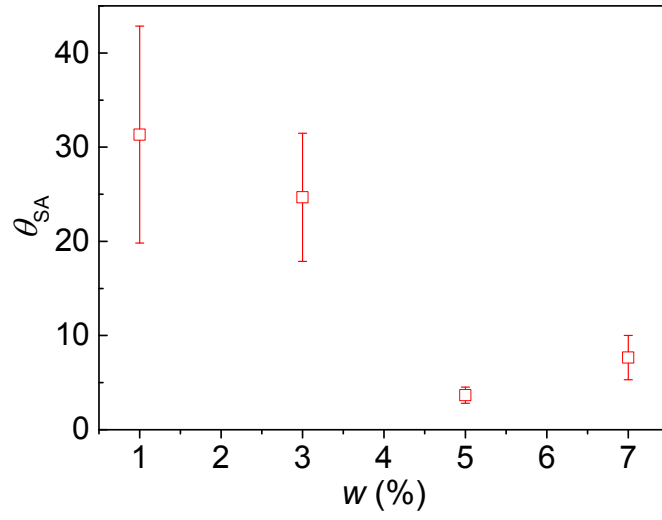

**Figure S6.** Sliding angles of oil (dichloroethane) droplet on IMCM treated with different  $w$  underwater. For  $w < 5\%$ ,  $\theta_{SA} > 20^\circ$  and for  $w \geq 5\%$ ,  $\theta_{SA} < 10^\circ$ . The results shows that IMCM treated with  $w \geq 5\%$  manifests superoleophobicity and low-adhesion underwater.

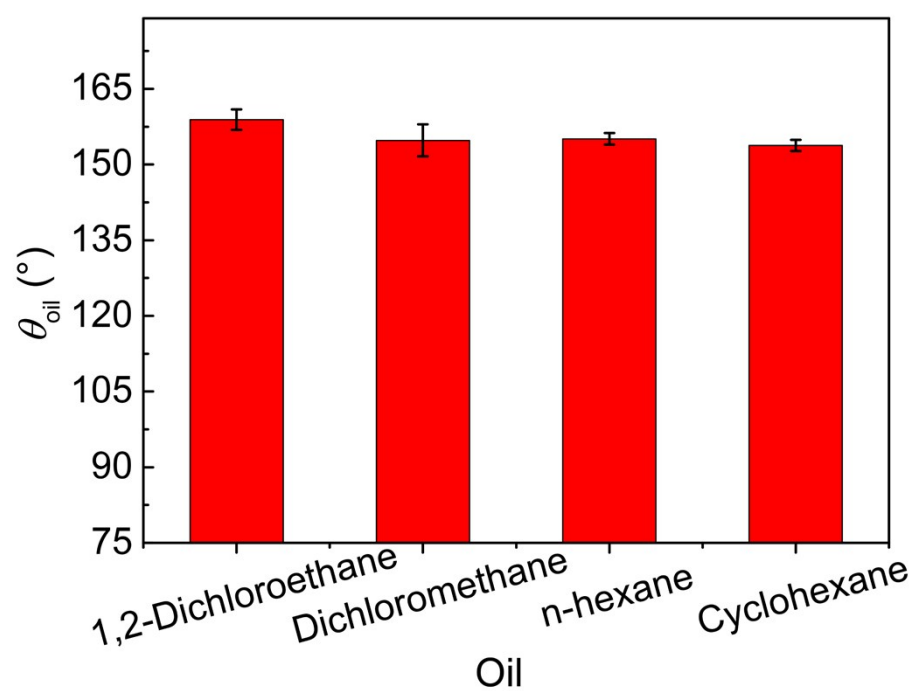

**Figure S7.** The contact angle of different types of oils on the IMCM surfaces with  $w = 5\%$ .



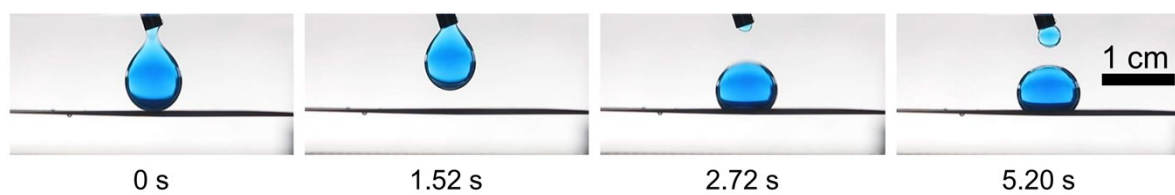

**Figure S8.** Dynamic test of water droplets impacting on the IMCM with  $w = 5\%$  without pre-wetting under oil (liquid paraffin) environment. The water droplet could not spread on the surface and the methylene blue in water droplet could not be catalytically degraded.

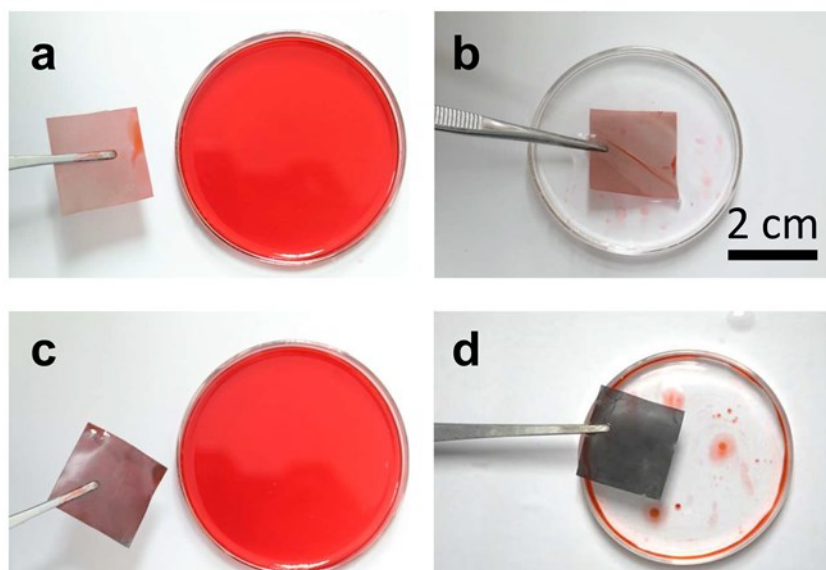

**Figure S9.** The self-cleaning property test of IMCM. (a) The image of the IMCM with  $w = 0\%$  after immersing into the oil. (b) The image of the prewetted IMCM with  $w = 0\%$  contained with oil after immersing in the water. There was still some oil contamination on the surface of the mesh. (c) The image of the prewetted IMCM with  $w = 5\%$  after immersing into the oil. (d) The image of the IMCM with  $w = 5\%$  contained with oil after immersing in the water. The surface of the mesh is clean.

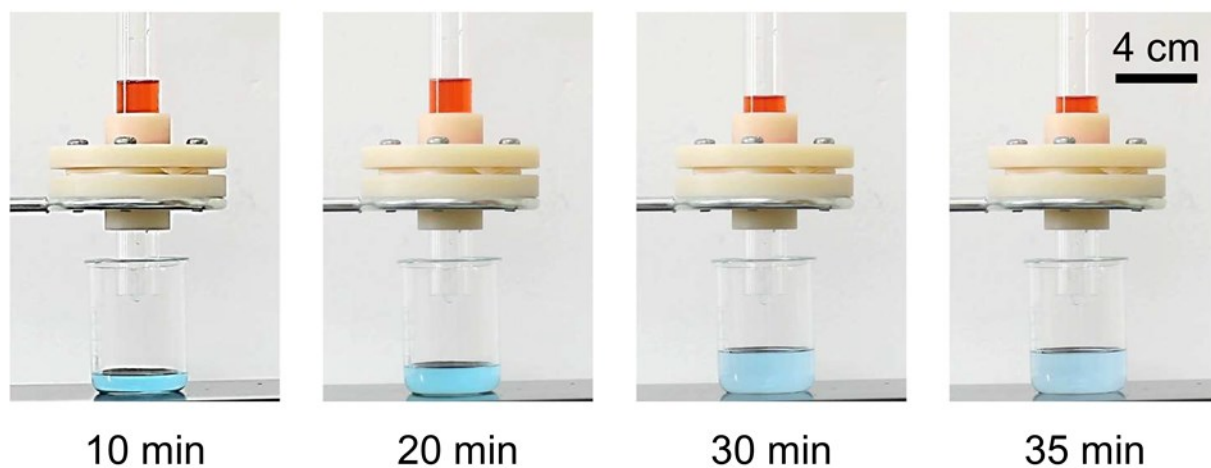

**Figure S10.** The catalytic degradation performance of IMCM with  $w = 0\%$ . After 35 minutes, the color of the water collected was still blue.

**Table S1** The measured value of breakthrough pressure for different oils

| Oils           | Oil-water interfacial<br>force (mN/m) | OCA (°) | Breakthrough<br>pressure(kPa) |
|----------------|---------------------------------------|---------|-------------------------------|
| n-hexane       | 51.1                                  | 156.7   | 2.03                          |
| diesel         | 30.3                                  | 154.1   | 1.20                          |
| dichloroethane | 27.9                                  | 158.2   | 1.11                          |
| toluene        | 36.1                                  | 155.0   | 1.43                          |
